# Supplementary material for: Regulating energy band alignment for high-performance broadband perovskite photodetectors
Source: Royal Society of Chemistry journal article supplement (doi:10.1039/d4ta01965b), 2024-01-01
Supplement: d4ta01965b1.pdf [file d4ta01965b1.pdf]

*Supplementary Information*

**Regulating Energy Band Alignment for High-performance Broadband  
Perovskite Photodetectors**

Jun Wu<sup>1</sup>, Yuchen Miao<sup>1</sup>, Xiaorong Qi<sup>1</sup>, Liu Yang<sup>1</sup>, Xu Wang<sup>1</sup>, Fei Zheng<sup>1</sup>, Feiyu  
Zhao<sup>1</sup>, Zhenfu Zhao<sup>1</sup>, Shareen Shafique<sup>1</sup>, Houcheng Zhang<sup>2</sup>, Ziyang Hu<sup>1,\*</sup>

<sup>1</sup>Department of Microelectronic Science and Engineering, School of Physical Science  
and Technology, Ningbo University, Ningbo 315211, China

<sup>2</sup>College of New Energy, Ningbo University of Technology, Ningbo 315211, China

E-mail: [huziyang@nbu.edu.cn](mailto:huziyang@nbu.edu.cn).

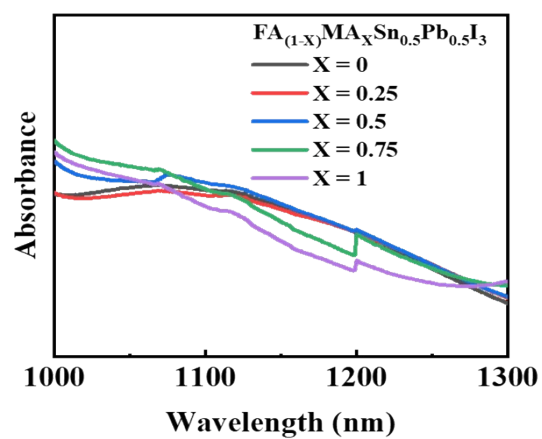

**Figure S1.** UV-vis-NIR absorption spectrum in the range of 1000-1300 nm

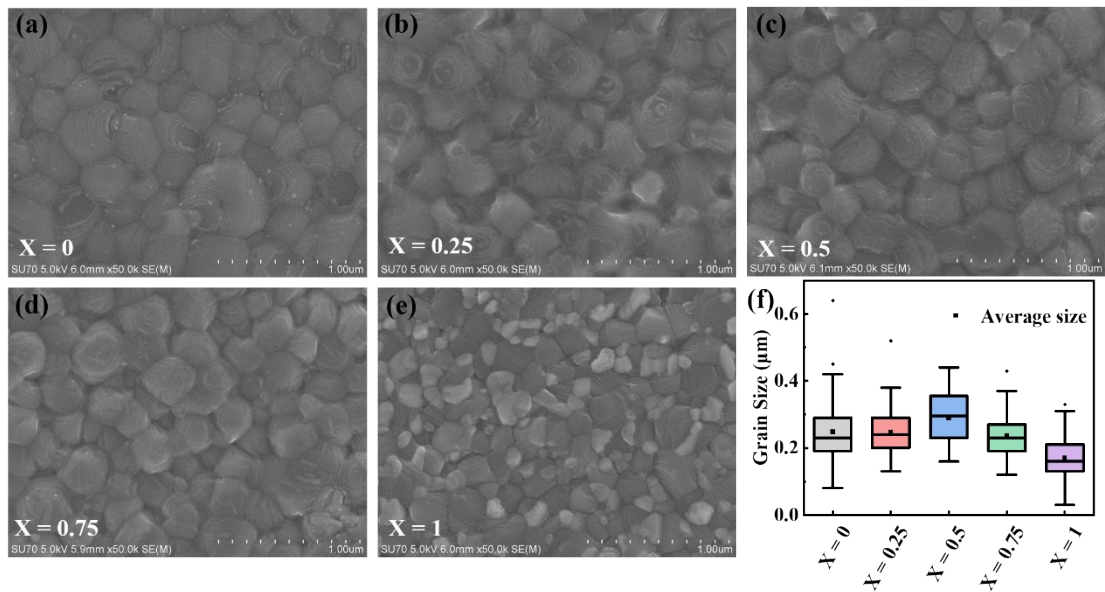

**Figure S2.** (a-e) SEM images of  $\text{FA}_{(1-x)}\text{MA}_x\text{Sn}_{0.5}\text{Pb}_{0.5}\text{I}_3$  perovskite films. (f) Statistical diagram of grain size of perovskite with different FA/MA compositions.

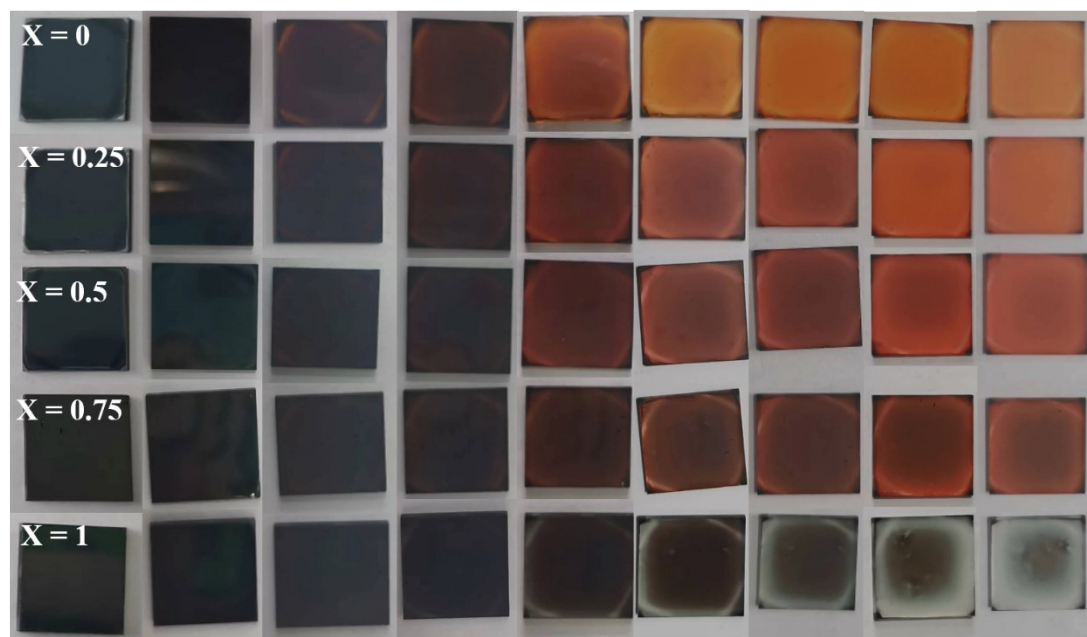

**Figure S3.** Degradation process of perovskite with different FA/MA components in room temperature air (25 °C, 60% RH).

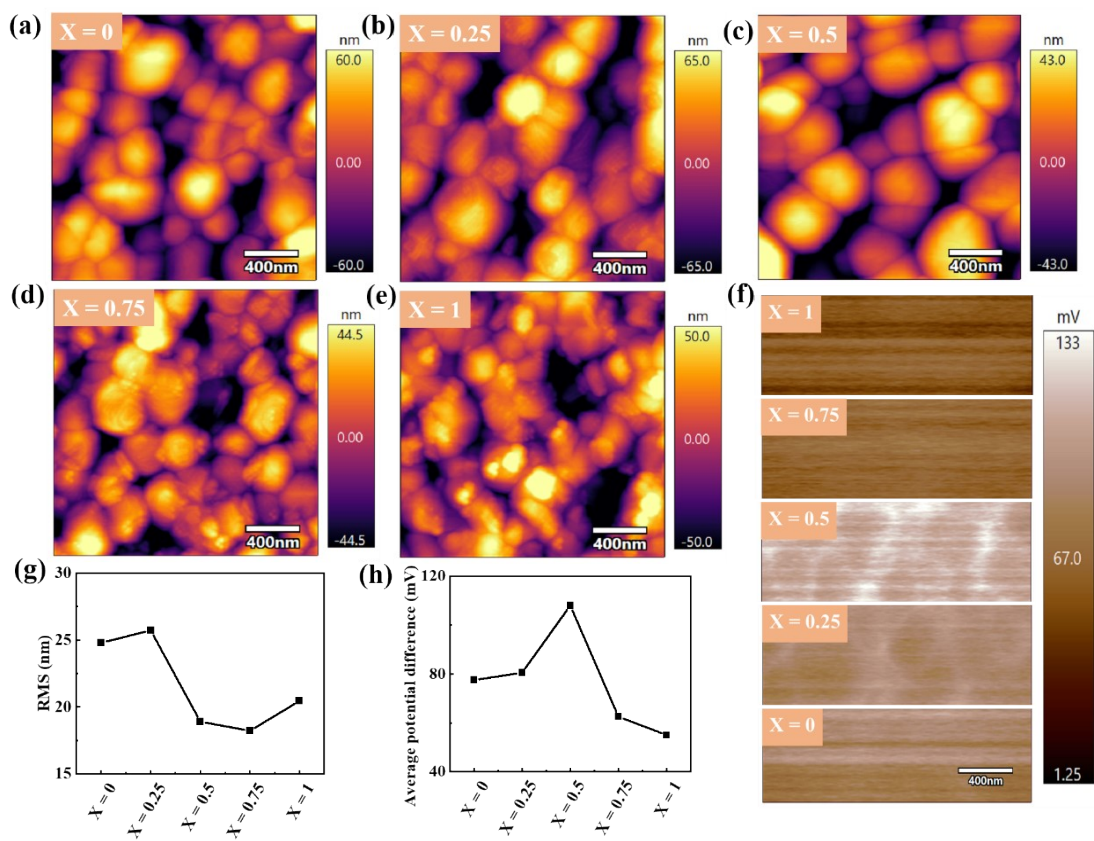

**Figure S4.** (a-e) AFM surface topography of  $\text{FA}_{(1-x)}\text{MA}_x\text{Sn}_{0.5}\text{Pb}_{0.5}\text{I}_3$  perovskite thin films. (f) KPFM diagrams, (g) Roughness comparison diagram and (h) Average potential difference comparison diagram of perovskite with various FA/MA compositions.

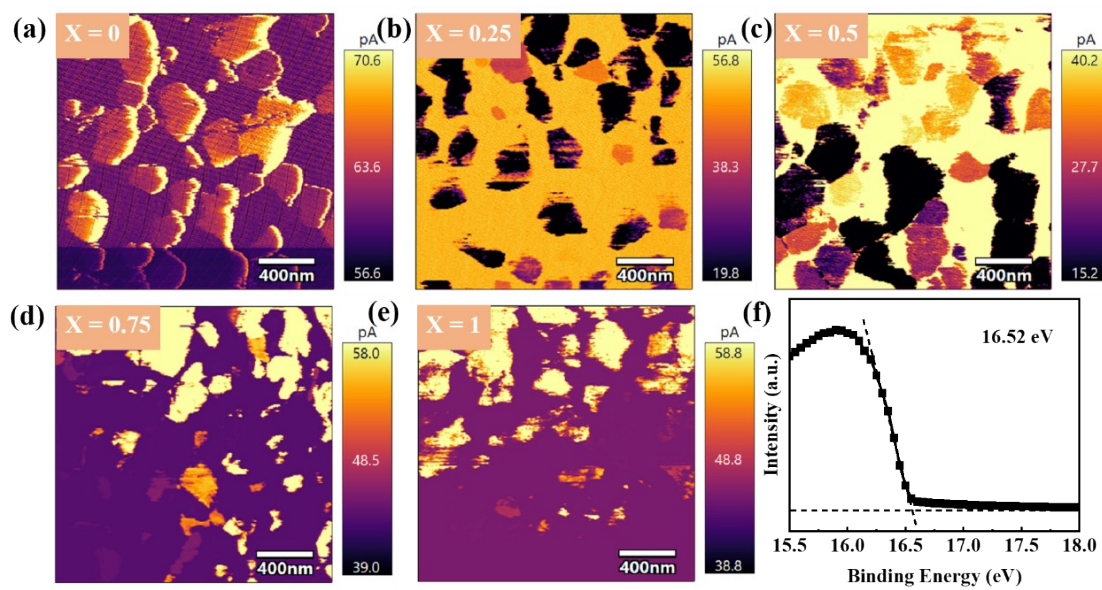

**Figure S5.** (a-e) C-AFM images of perovskite films with different FA/MA components. (f) UPS spectrum of ITO.

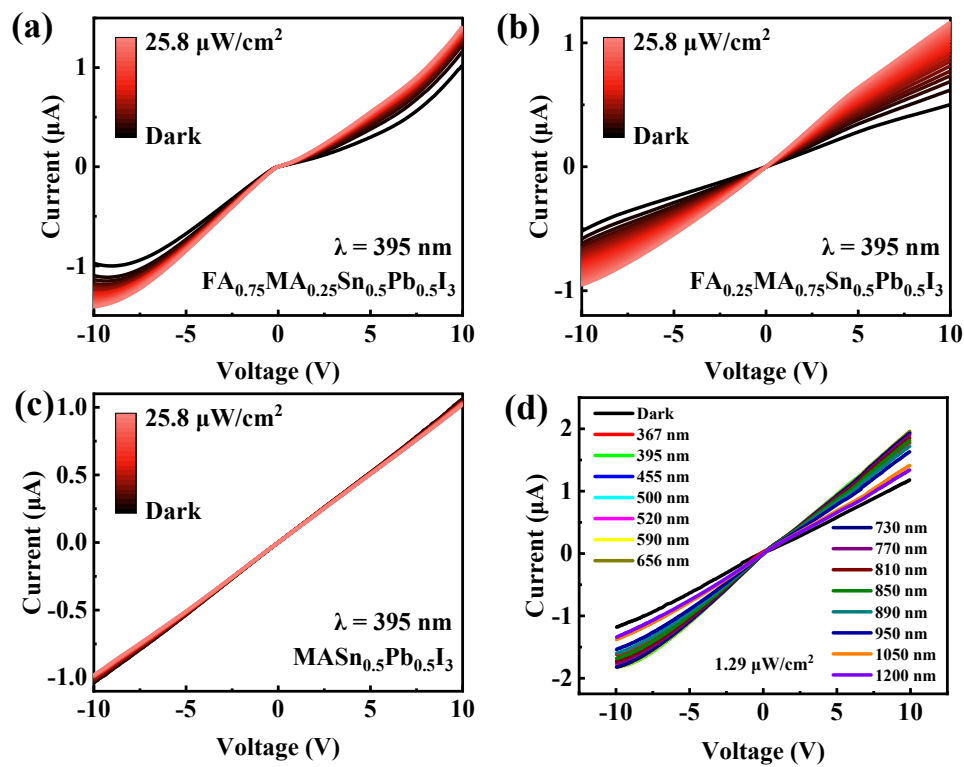

**Figure S6.** (a) *I-V* curves under dark and illumination for  $\text{FA}_{0.75}\text{MA}_{0.25}\text{Sn}_{0.5}\text{Pb}_{0.5}\text{I}_3$  device, (b)  $\text{FA}_{0.25}\text{MA}_{0.75}\text{Sn}_{0.5}\text{Pb}_{0.5}\text{I}_3$  device and (c)  $\text{MASn}_{0.5}\text{Pb}_{0.5}\text{I}_3$  devices. (d) *I-V* curves of the optimized device at 367-1200 nm ( $1.29 \mu\text{W}/\text{cm}^2$ ).

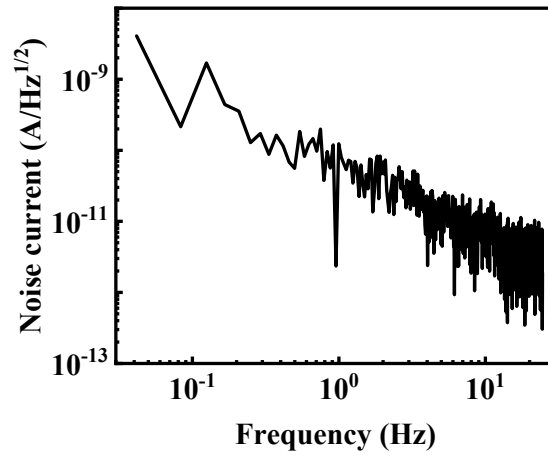

**Figure S7.** Noise spectral density curve.



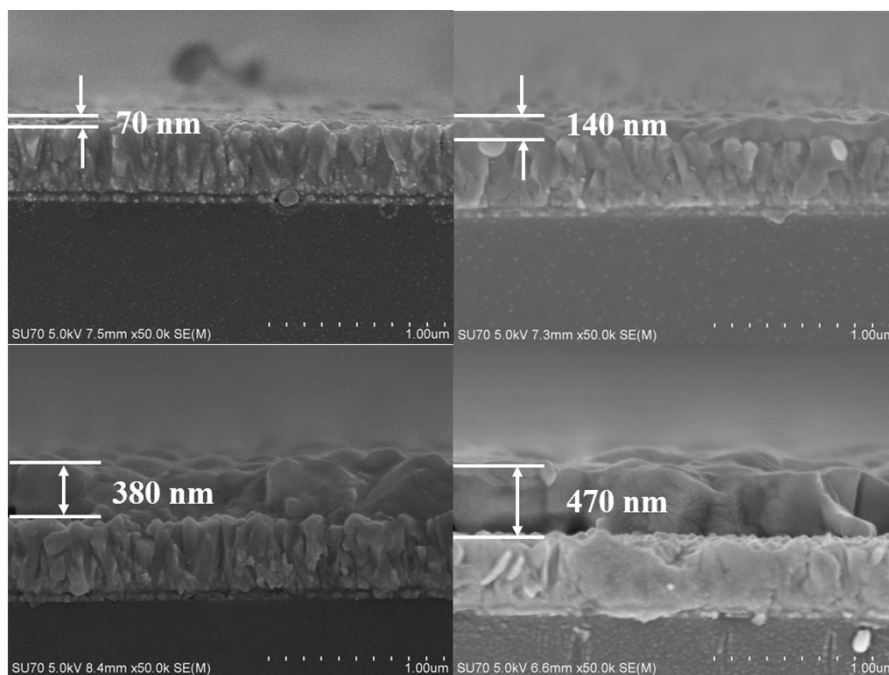

**Figure S8.** SEM images of the cross section of perovskites.

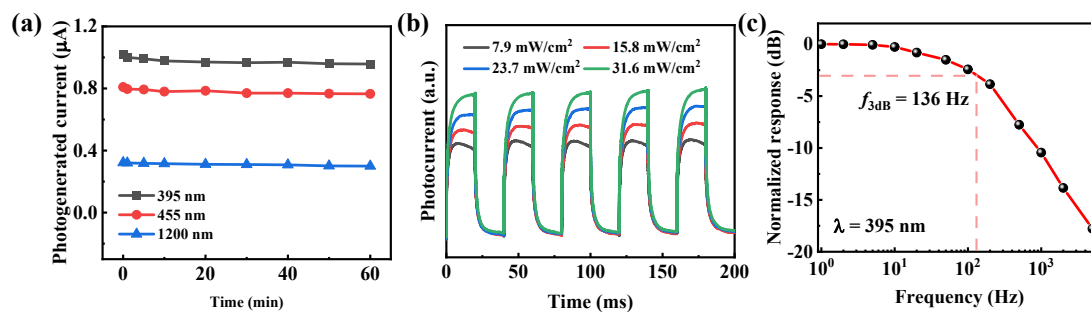

**Figure S9.** (a) Changes of photogenerated current under long-term irradiation with different wavelengths. (b)  $I$ - $T$  curves of the photodetector under the illumination of 395 nm light. (c) Relationship between normalized light response change and frequency.

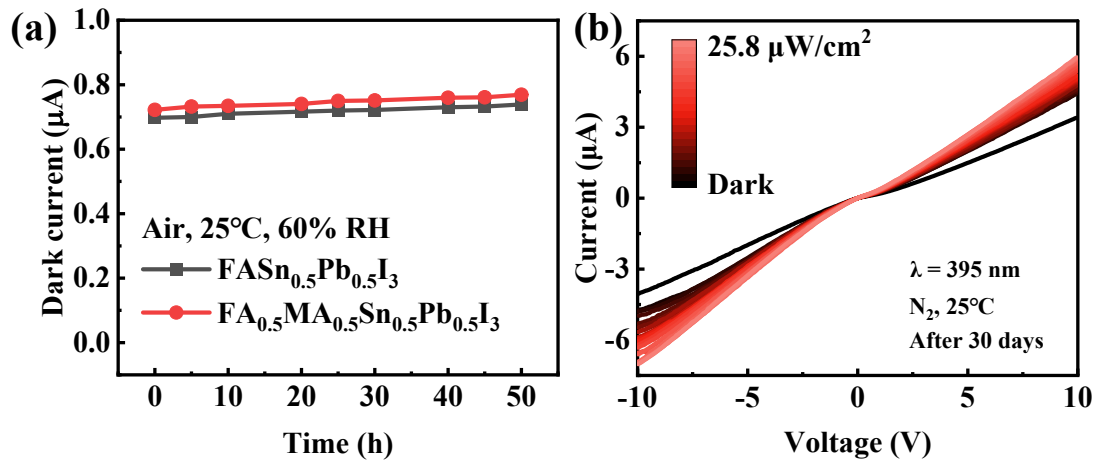

**Figure S10.** (a) Variation of dark current of devices with time. (b) After 30 days, the optical response curves at 395 nm.

**Table S1.** Comparison of perovskite photodetectors with wide spectrum response.

| Perovskite<br>(Wavelength range)                                                                                               | Responsivity<br>(A/W)                                          | Detectivity<br>(Jones)                                                             | Linear<br>dynamic<br>range<br>(dB) | Response<br>time ( $t_r/t_f$ ) | Ref. |
|--------------------------------------------------------------------------------------------------------------------------------|----------------------------------------------------------------|------------------------------------------------------------------------------------|------------------------------------|--------------------------------|------|
| CsSnI <sub>3</sub> nanowire<br>(475-940 nm)                                                                                    | 0.054<br>(940 nm)                                              | $3.85 \times 10^5$ (a)<br>(940 nm)                                                 | —                                  | 83.8/243.4 ms                  | 1    |
| (MAPbI <sub>3</sub> ) <sub>0.2</sub> (FASnI <sub>3</sub> ) <sub>0.8</sub><br>single crystals (405-1064<br>nm)                  | 0.247<br>(405 nm)<br>0.012<br>(1064 nm)                        | $1.12 \times 10^{12}$ (a)<br>(405 nm)<br>$2.58 \times 10^{10}$ (a)<br>(1064 nm)    | —                                  | 59/41 ms                       | 2    |
| FASnI <sub>3</sub> (500-850 nm)                                                                                                | $1.1 \times 10^5$<br>(685 nm)                                  | $1.9 \times 10^{12}$ (b)<br>(685 nm)                                               | —                                  | 8.7/57 s                       | 3    |
| MAPbBr <sub>3</sub> single crystals<br>(520-1450 nm)                                                                           | 5.04<br>(520 nm)                                               | $5.37 \times 10^{12}$ (b)<br>(520 nm)                                              | 122                                | 80 /110 $\mu$ s                | 4    |
| (BA) <sub>2</sub> (MA)Sn <sub>2</sub> I <sub>7</sub> single<br>crystals (365-1064 nm)                                          | 28.4<br>(365 nm)<br>0.02<br>(1064 nm)                          | $2.3 \times 10^{10}$ (a)<br>(365 nm)<br>$1.8 \times 10^7$ (a)<br>(1064 nm)         | —                                  | 0.6 /1.2 s                     | 5    |
| (FASnI <sub>3</sub> ) <sub>0.1</sub> (MAPbI <sub>3</sub> ) <sub>0.9</sub><br>single crystals (350-840<br>nm)                   | 0.53<br>(800 nm)                                               | $7.09 \times 10^{10}$ (b)<br>(800 nm)                                              | 163.5                              | 22.78/20.35<br>$\mu$ s         | 6    |
| Cs <sub>0.05</sub> MA <sub>0.45</sub> FA <sub>0.5</sub> Pb <sub>0.5</sub> Sn <sub>0</sub><br>.5I <sub>3</sub><br>(300-1050 nm) | 0.53<br>(910 nm)                                               | $2.07 \times 10^{11}$ (b)<br>(910 nm)                                              | —                                  | — /35.37 ns                    | 7    |
| Cs <sub>0.05</sub> MA <sub>0.45</sub> FA <sub>0.5</sub> Pb <sub>0.5</sub> Sn <sub>0</sub><br>.5I <sub>3</sub><br>(300-1000 nm) | 0.29<br>(720 nm)<br>0.2<br>(940 nm)                            | $3.4 \times 10^{12}$ (a)<br>$1.6 \times 10^9$ (b)<br>$1.7 \times 10^5$<br>(980 nm) | 83.6                               | 2/2.1 $\mu$ s                  | 8    |
| (MA <sub>0.5</sub> FA <sub>0.5</sub> )<br>(Pb <sub>0.5</sub> Sn <sub>0.5</sub> )I <sub>3</sub><br>(370-980 nm)                 | $5.8 \times 10^5$<br>(760 nm)<br>$4.6 \times 10^4$<br>(370 nm) | $2.0 \times 10^{14}$ (b)<br>(760 nm)<br>$1.6 \times 10^{13}$ (b)<br>(370 nm)       | —                                  | 80/ — ms                       | 9    |
| FA <sub>0.85</sub> Cs <sub>0.15</sub> Sn <sub>0.5</sub> Pb <sub>0.5</sub> I <sub>3</sub>                                       | 0.52<br>(910 nm)                                               | $8.48 \times 10^{12}$ (b)<br>(910 nm)                                              | 213                                | 67.5/720 ns                    | 10   |

|                                                                                          |                         |                             |     |              |    |
|------------------------------------------------------------------------------------------|-------------------------|-----------------------------|-----|--------------|----|
| (300-1100 nm)                                                                            |                         |                             |     |              |    |
| Cs <sub>0.15</sub> FA <sub>0.85</sub> Pb <sub>0.5</sub> Sn <sub>0.5</sub> I <sub>3</sub> | 0.52                    | 5.34 × 10 <sup>12</sup> (b) | 224 | — /39.68 ns  | 11 |
| (325-980 nm)                                                                             | (850 nm)                | (850 nm)                    |     |              |    |
| FA <sub>0.8</sub> PEA <sub>0.2</sub> SnI <sub>3</sub>                                    | 0.262                   | 2.3 × 10 <sup>11</sup> (b)  | 83  | 27.7/20.4 μs | 12 |
| (350-900 nm)                                                                             | (780 nm)                | (850 nm)                    |     |              |    |
| MA <sub>0.3</sub> FA <sub>0.7</sub> Pb <sub>0.5</sub> Sn <sub>0.5</sub> I <sub>3</sub>   | 0.16                    | 6.6 × 10 <sup>10</sup> (b)  |     |              |    |
| (780-1100 nm)                                                                            | (850 nm)                | (850 nm)                    | —   | —            | 13 |
|                                                                                          | 0.1                     | 4.2 × 10 <sup>10</sup> (b)  |     |              |    |
|                                                                                          | (940 nm)                | (940 nm)                    |     |              |    |
| FA <sub>0.7</sub> MA <sub>0.3</sub> Pb <sub>0.5</sub> Sn <sub>0.5</sub> I <sub>3</sub>   | 0.52                    | 7.5 × 10 <sup>11</sup> (b)  |     | 94/97 ns     | 14 |
| (500-950 nm)                                                                             | (930 nm)                | (930 nm)                    |     |              |    |
| MASnI <sub>3</sub> nanowire array                                                        | 0.47                    | 8.8 × 10 <sup>10</sup> (a)  |     | 1.5/0.4 s    | 15 |
| (200-1000 nm)                                                                            |                         |                             |     |              |    |
| MAPbI <sub>3</sub>                                                                       | 4                       | —                           |     | 39/1.9 μs    | 16 |
| (400-1000 nm)                                                                            | (800 nm)                |                             |     |              |    |
| MAPbI <sub>3</sub>                                                                       | 0.15                    | —                           |     | 120/80 ms    | 17 |
| (400-1064 nm)                                                                            | (820 nm)                |                             |     |              |    |
| MAPbI <sub>3</sub> nanocrystal                                                           | 1.42                    | 1.7 × 10 <sup>13</sup> (a)  |     | 0.28/0.34 s  | 18 |
| (400-980 nm)                                                                             | (808 nm)                | (808 nm)                    |     |              |    |
|                                                                                          | 4.43 × 10 <sup>-5</sup> | 1.34 × 10 <sup>8</sup> (a)  |     |              |    |
|                                                                                          | (980 nm)                | (980 nm)                    |     |              |    |
| MAPbI <sub>3-x</sub> Cl <sub>x</sub>                                                     | 7.6 × 10 <sup>8</sup>   | 5.6 × 10 <sup>13</sup> (b)  |     |              | 19 |
| (350-1100 nm)                                                                            | (895 nm)                | (895 nm)                    |     |              |    |
|                                                                                          | 1.91 × 10 <sup>9</sup>  |                             |     |              |    |
|                                                                                          | (598 nm)                |                             |     |              |    |
| MAPbI <sub>3</sub>                                                                       | —                       | 7.13 × 10 <sup>11</sup> (b) |     |              | 20 |
| (600-900 nm)                                                                             |                         | (800 nm)                    |     |              |    |
| CsSnI <sub>3</sub>                                                                       | 0.257                   | 1.5 × 10 <sup>11</sup> (a)  |     | 0.35/1.6 ms  | 21 |
| (350-1000 nm)                                                                            | (850 nm)                | (850 nm)                    |     |              |    |
| FA <sub>0.85</sub> Cs <sub>0.15</sub> Sn <sub>0.5</sub> Pb <sub>0.5</sub> I <sub>3</sub> | 0.53                    | 6 × 10 <sup>12</sup> (b)    | 103 | 58.3/860 ns  | 22 |
| (600-1000 nm)                                                                            | (940 nm)                | (940 nm)                    |     |              |    |
| (FASnI <sub>3</sub> ) <sub>0.6</sub> (MAPbI <sub>3</sub> ) <sub>0.4</sub>                | 0.4                     | 1.1 × 10 <sup>12</sup> (b)  | 167 | 6.9/9.1 μs   | 23 |
| (300-1000 nm)                                                                            | (950 nm)                | (900 nm)                    |     |              |    |

|                                                                                                                                                                                          |                                       |                                                                         |      |               |           |
|------------------------------------------------------------------------------------------------------------------------------------------------------------------------------------------|---------------------------------------|-------------------------------------------------------------------------|------|---------------|-----------|
| MA <sub>0.5</sub> FA <sub>0.5</sub> Pb <sub>0.5</sub> Sn <sub>0.5</sub> I <sub>3</sub><br>(350-1000 nm)                                                                                  | > 0.2<br>(800-950 nm)                 | > 10 <sup>12</sup> (b)<br>(800-970 nm)                                  | —    | —             | 24        |
| MA <sub>0.975</sub> Rb <sub>0.025</sub> Sn <sub>0.65</sub> Pb <sub>0.35</sub> I <sub>3</sub><br>(300-1100 nm)                                                                            | 0.4<br>(910 nm)                       | > 10 <sup>12</sup> (b)<br>(340-1000 nm)                                 | 110  | 0.04/0.468 μs | 25        |
| MASn <sub>x</sub> Pb <sub>1-x</sub> I <sub>3</sub><br>(300-1100 nm)                                                                                                                      | 0.2<br>(940 nm)                       | > 10 <sup>11</sup> (b)<br>(360-985 nm)                                  | 100  | 0.09/2.27 μs  | 26        |
| (FASnI <sub>3</sub> ) <sub>0.6</sub> (MAPbI <sub>3</sub> ) <sub>0.4</sub><br>(300-1000 nm)                                                                                               | —                                     | ≈ 10 <sup>11</sup> (a)<br>(850 nm)                                      | —    | 19/13 ms      | 27        |
| CsPb <sub>0.5</sub> Sn <sub>0.5</sub> I <sub>3</sub> (5%<br>(PEA) <sub>2</sub> Pb <sub>0.5</sub> Sn <sub>0.5</sub> I <sub>4</sub> )<br>(700-900 nm)                                      | 0.27(850 nm)                          | 5.42 × 10 <sup>14</sup> (b)<br>(850 nm)                                 | —    | —             | 28        |
| MA <sub>0.5</sub> FA <sub>0.5</sub> Pb <sub>0.5</sub> Sn <sub>0.5</sub> I <sub>3</sub><br>(2.5% (PEA) <sub>2</sub> Pb <sub>0.5</sub> Sn <sub>0.5</sub> I <sub>4</sub> )<br>(700-1000 nm) | ≈ 0.1<br>(800 nm)                     | 1.6 × 10 <sup>12</sup> (b)<br>(800 nm)                                  | —    | 10/10 μs      | 29        |
| FA <sub>0.5</sub> MA <sub>0.45</sub> Cs <sub>0.05</sub> Pb <sub>0.5</sub> Sn <sub>0.5</sub> I <sub>3</sub><br>(300-1050 nm)                                                              | 0.35<br>(950 nm)                      | 2.21 × 10 <sup>11</sup> (b)<br>(758 nm)                                 | 185  | —             | 30        |
| (FASnI <sub>3</sub> ) <sub>0.6</sub> (MAPbI <sub>3</sub> ) <sub>0.4</sub><br>(500-1100 nm)                                                                                               | 0.04<br>(900 nm)<br>0.01<br>(1100 nm) | 2.24 × 10 <sup>10</sup> (a)<br>(900 nm)                                 | —    | 20/40 ms      | 31        |
| CsSn <sub>0.6</sub> Pb <sub>0.4</sub> I <sub>2.6</sub> Br <sub>0.4</sub><br>(454-860 nm)                                                                                                 | 21<br>(860 nm)                        | 3.9 × 10 <sup>10</sup> (a)<br>(860 nm)                                  | —    | 0.74/0.56 s   | 32        |
| FA <sub>0.5</sub> MA <sub>0.5</sub> Sn <sub>0.5</sub> Pb <sub>0.5</sub> I <sub>3</sub><br>(367-1200 nm)                                                                                  | 1.2 × 10 <sup>3</sup><br>(395 nm)     | 4.4 × 10 <sup>13</sup> (a)<br>2.02 × 10 <sup>13</sup> (b)<br>(395 nm)   | 66.5 | 2.4/5.4 ms    | This work |
|                                                                                                                                                                                          | 1.1 × 10 <sup>3</sup><br>(455 nm)     | 3.98 × 10 <sup>13</sup> (a)<br>1.52 × 10 <sup>12</sup> (b)<br>(455 nm)  |      |               |           |
|                                                                                                                                                                                          | 24.73<br>(1200 nm)                    | 1.01 × 10 <sup>12</sup> (a)<br>4.16 × 10 <sup>11</sup> (b)<br>(1200 nm) |      |               |           |
|                                                                                                                                                                                          |                                       |                                                                         |      |               |           |

(a) Calculate via  $D^* = R \sqrt{\frac{A_{rea}}{2eI_{dark}}}$ , (b) Calculate via  $D^* = \frac{\sqrt{A_{rea}\Delta f}}{NEP}$

## References

- 1 M. Han, J. Sun, M. Peng, N. Han, Z. Chen, D. Liu, Y. Guo, S. Zhao, C. Shan, T. Xu, X. Hao, W. Hu and Z.-x. Yang, *J. Phys. Chem. C* **2019**, *123*, 17566-17573.
- 2 Q. Li, S. Wang, C. Jia, H. Liu and X. Li, *J Phys Chem Lett* **2023**, *14*, 5148-5154.
- 3 C. K. Liu, Q. Tai, N. Wang, G. Tang, H. L. Loi and F. Yan, *Adv. Sci.* **2019**, *6*, 1900751.
- 4 L. Mei, K. Zhang, N. Cui, W. Yu, Y. Li, K. Gong, H. Li, N. Fu, J. Yuan, H. Mu, Z. Huang, Z. Xu, S. Lin and L. Zhu, *Small* **2023**, *19*, 2301386.
- 5 Y. Xu, F. Wang, J. Xu, X. Lv, G. Zhao, Z. Sun, Z. Xie and S. Zhu, *Opt. Express* **2023**, *31*, 8428-8439.
- 6 Z. Chang, Z. Lu, W. Deng, Y. Shi, Y. Sun, X. Zhang and J. Jie, *Nanoscale* **2023**, *15*, 5053-5062.
- 7 Y. Zhao, C. Li, J. Jiang, B. Wang and L. Shen, *Small* **2020**, *16*, 2070146.
- 8 W. Li, J. Chen, H. Lin, S. Zhou, G. Yan, Z. Zhao, C. Zhao and W. Mai, *Adv. Opt. Mater.* **2023**, *12*, 2301373.
- 9 H.-L. Loi, J. Cao, C.-K. Liu, Y. Xu, M. G. Li and F. Yan, *Small* **2023**, *19*, 2205976.
- 10 H. Liu, L. Zhu, H. Zhang, X. He, F. Yan, K. S. Wong and W. C. H. Choy, *ACS Energy Lett.* **2022**, *8*, 577-589.
- 11 L. He, G. Hu, J. Jiang, W. Wei, X. Xue, K. Fan, H. Huang and L. Shen, *Adv. Mater.* **2023**, *35*, 2210016.
- 12 M. He, Z. Xu, C. Zhao, Y. Gao, K. Ke, N. Liu, X. Yao, F. Kang, Y. Shen, L. Lin and G. Wei, *Adv. Funct. Mater.* **2023**, *33*, 2300282.
- 13 A. Moeini, L. Martínez-Sarti, K. P. S. Zanoni, M. Sessolo, D. Tordera and H. J. Bolink, *J. Mater. Chem. C* **2022**, *10*, 13878-13885.
- 14 F. Liu, K. Liu, S. Rafique, Z. Xu, W. Niu, X. Li, Y. Wang, L. Deng, J. Wang, X. Yue, T. Li, J. Wang, P. Ayala, C. Cong, Y. Qin, A. Yu, N. Chi and Y. Zhan, *Adv. Sci.* **2023**, *10*, 2205879.
- 15 A. Waleed, M. M. Tavakoli, L. Gu, Z. Wang, D. Zhang, A. Manikandan, Q. Zhang, R. Zhang, Y.-L. Chueh and Z. Fan, *Nano Lett.* **2017**, *17*, 523-530.

- 16 Y. Zhang, Y. Liu, Z. Yang and S. Liu, *J. Energy Chem.* **2018**, *27*, 722-727.
- 17 Q. Lin, A. Armin, P. L. Burn and P. Meredith, *Laser & Photonics Reviews* **2016**, *10*, 1047-1053.
- 18 C. Perumal Veeramalai, S. Yang, R. Zhi, M. Sulaman, M. I. Saleem, Y. Cui, Y. Tang, Y. Jiang, L. Tang and B. Zou, *Adv. Opt. Mater.* **2020**, *8*, 2000215.
- 19 C. Xie, P. You, Z. Liu, L. Li and F. Yan, *Light: Science & Applications* **2017**, *6*, e17023-e17023.
- 20 B. Du, W. Yang, Q. Jiang, H. Shan, D. Luo, B. Li, W. Tang, F. Lin, B. Shen, Q. Gong, X. Zhu, R. Zhu and Z. Fang, *Adv. Opt. Mater.* **2018**, *6*, 1701271.
- 21 F. Cao, W. Tian, M. Wang, M. Wang and L. Li, *InfoMat* **2020**, *2*, 577-584.
- 22 H. Liu, H. L. Zhu, Z. Wang, X. Wu, Z. Huang, M. R. Huqe, J. A. Zapien, X. Lu and W. C. H. Choy, *Adv. Funct. Mater.* **2021**, *31*, 2010532.
- 23 W. Wang, D. Zhao, F. Zhang, L. Li, M. Du, C. Wang, Y. Yu, Q. Huang, M. Zhang, L. Li, J. Miao, Z. Lou, G. Shen, Y. Fang and Y. Yan, *Adv. Funct. Mater.* **2017**, *27*, 1703953.
- 24 X. Xu, C.-C. Chueh, P. Jing, Z. Yang, X. Shi, T. Zhao, L. Y. Lin and A. K. Y. Jen, *Adv. Funct. Mater.* **2017**, *27*, 1701053.
- 25 H. L. Zhu, Z. Liang, Z. Huo, W. K. Ng, J. Mao, K. S. Wong, W.-J. Yin and W. C. H. Choy, *Adv. Funct. Mater.* **2018**, *28*, 1706068.
- 26 H. L. Zhu, H. Lin, Z. Song, Z. Wang, F. Ye, H. Zhang, W.-J. Yin, Y. Yan and W. C. H. Choy, *ACS Nano* **2019**, *13*, 11800-11808.
- 27 Y. Wang, C. Chen, T. Zou, L. Yan, C. Liu, X. Du, S. Zhang and H. Zhou, *Advanced Materials Technologies* **2020**, *5*, 1900752.
- 28 F. Cao, J. Chen, D. Yu, S. Wang, X. Xu, J. Liu, Z. Han, B. Huang, Y. Gu, K. L. Choy and H. Zeng, *Adv. Mater.* **2020**, *32*, 1905362.
- 29 J. Liu, Y. Zou, B. Huang, Y. Gu, Y. Yang, Z. Han, Y. Zhang, X. Xu and H. Zeng, *Nanoscale* **2020**, *12*, 20386-20395.
- 30 N. Ma, J. Jiang, Y. Zhao, L. He, Y. Ma, H. Wang, L. Zhang, C. Shan, L. Shen and W. Hu, *Nano Energy* **2021**, *86*, 106113.
- 31 L. Yan, X. Du, C. Liu, S. Zhang and H. Zhou, *Phys. Status Solidi (a)* **2019**, *216*,



1900417.

32 C. Jo, S. Lee, J. Kim, J. S. Heo, D.-W. Kang and S. K. Park, *ACS Appl. Mater.*

*Interfaces* **2020**, *12*, 58038-58048.
